# Supplementary material for: Panicle Apical Abortion 7 Regulates Panicle Development in Rice (Oryza sativa L.)
Source: MDPI journal article supplement (doi:10.3390/ijms23169487), 2022-08-22
Supplement: s1 [file s1]

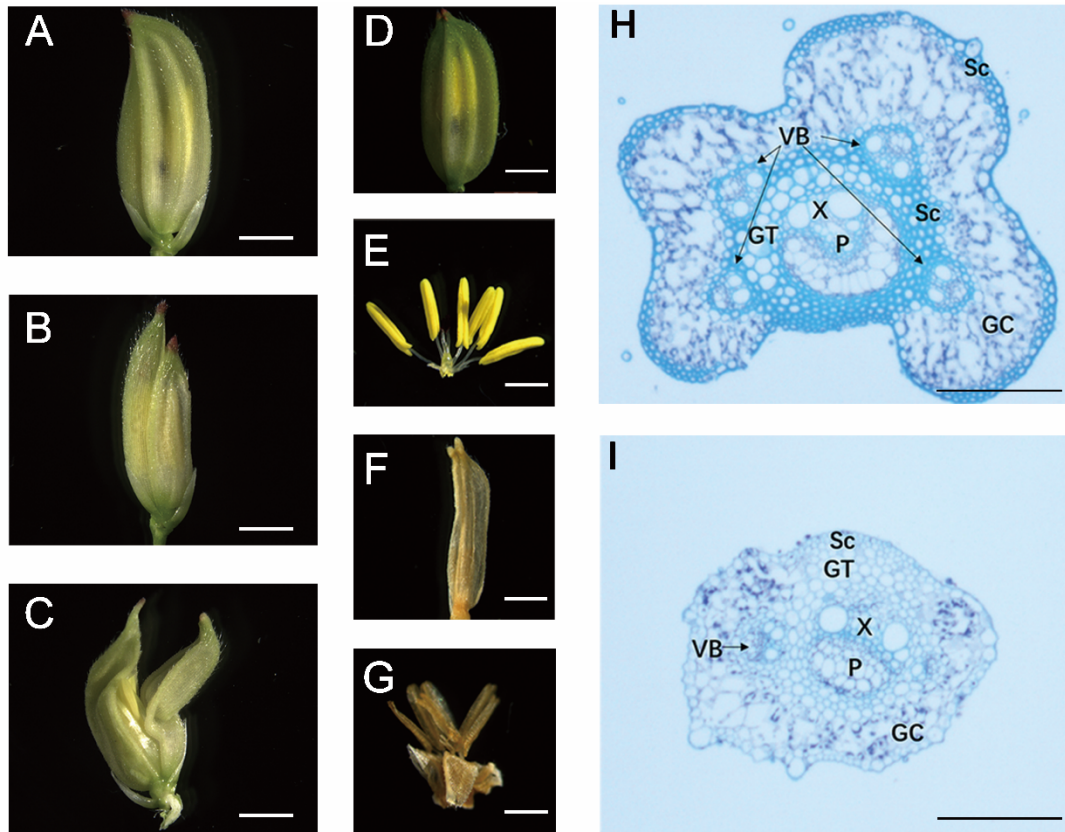

**Figure S1 Observations of spikelets and pedicels in WT and *paa7*.**

(A-G) Spikelets or floral organs in *paa7* (A-C, F, G) and WT (D, E), Bars =2mm. (B-C) Transverse sections of pedicels of WT (B) and *paa7* mutant. (C) of 12cm panicle, GC: green cells; GT: ground tissue; P: phloem; Sc: sclerenchyma VB: vascular bundle; X: xylem; Bars=100 $\mu$ m.

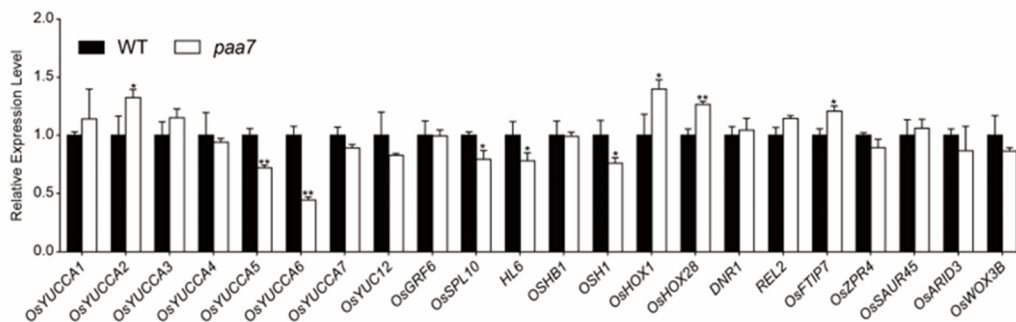

**Figure S2 Expression level of genes associated with auxin synthesis**

Expression level of genes involved the auxin synthesis pathway in 7cm panicles of WT and *paa7*, Data are shown as means  $\pm$  SD from 3 replicates. Double and single Asterisks indicate statistically significant differences compared to the WT at  $p < 0.01$  and  $p < 0.05$ , respectively, Student's *t*-test.

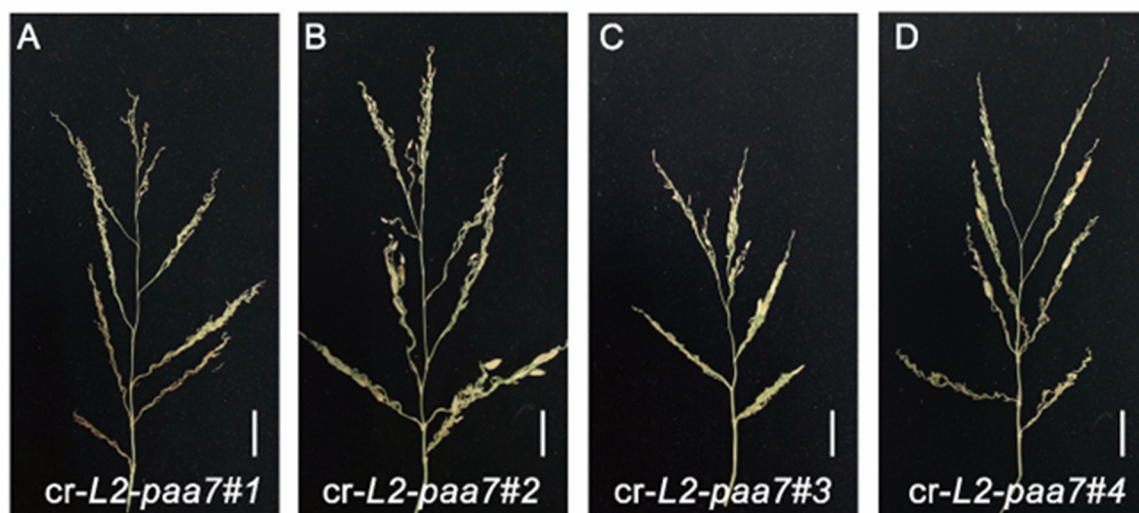

**Figure S3 Unfolded phenotype of transgenic plants.**

Panicle of *cr-L2-paa7#1* (A), *cr-L2-paa7#2* (B), *cr-L2-paa7#3* (C) and *cr-L2-paa7#4*(D), Bars =2 cm.

**Table S1. Genetic analysis of the *paa7* phenotype**

| Cross               | Year | F <sub>1</sub> | No. of F <sub>2</sub> Individuals |             | $\chi^2$ |
|---------------------|------|----------------|-----------------------------------|-------------|----------|
|                     |      |                | Wild type                         | Mutant Type |          |
| <i>paa7</i> ×II-32B | 2017 | Wild type      | 460                               | 159         | 0.1529   |
| <i>paa7</i> ×9311   |      | Wild type      | 989                               | 349         | 0.815    |
| <i>paa7</i> ×II-32B | 2018 | Wild type      | 4003                              | 1405        | 2.701    |
| <i>paa7</i> ×9311   |      | Wild type      | 2788                              | 872         | 2.7836   |

**Table S2. Phenotype statistics of derivation of *paa7* and *lax2-4* mutant**

| Cross | F <sub>1</sub> | No. of F <sub>2</sub> Individuals |                  |                    |                 | $\chi^2(9:3:3:1)$ |
|-------|----------------|-----------------------------------|------------------|--------------------|-----------------|-------------------|
|       |                | Wild Type                         | <i>paa7</i> Type | <i>lax2-4</i> Type | <i>ap1</i> Type |                   |

|                    |           |     |    |    |    |      |
|--------------------|-----------|-----|----|----|----|------|
| <i>paa7×lax2-4</i> | Wild type | 287 | 97 | 95 | 37 | 0.77 |
| <i>lax2-4×paa7</i> | Wild type | 259 | 82 | 88 | 24 | 0.94 |

**Table S3 List of primer names and corresponding sequences used in this study**

| Primer name     | Primer sequence (5'-3')                  | Experiments          |
|-----------------|------------------------------------------|----------------------|
| D20-F           | GATCGCCTTGGATTAAGAACAAGA                 | Fine mapping         |
| D20-R           | AATTTGAAGCCGTGGAGGAGA                    | Fine mapping         |
| I12-F           | ACCTTGCACTTTACCTTGCCT                    | Fine mapping         |
| I12-R           | TGTAGGATCAAGGAGGCCGA                     | Fine mapping         |
| D25-F           | CCCACCGTTCGTTGGTTTG                      | Fine mapping         |
| D25-R           | ATGGAGGAGGACTAGGGCTTT                    | Fine mapping         |
| D31-F           | TTACCCGGCACCGATTCTC                      | Fine mapping         |
| D31-R           | ACACTGGAAGCTACACTGGAAG                   | Fine mapping         |
| com-fzp-f       | gctcgggtacccgggatccCGATGTCCCCTGAAAATCA   | Vectors construction |
| com-fzp-r       | aggtcgactctagaggatccATCCACCACCTGCGTGTTAT | Vectors construction |
| OE-fzp-f        | ttctgcaggagctcgggtaccATGAACACTCGAGGCAG   | Vectors construction |
| OE-fzp-r        | tcgctcatggatccgggtaccTGAATGGAGAGTAGGAGTC | Vectors construction |
| FZP-OsU3T1F     | ggcaTATATGCATGATCGCTCAG                  | Vectors construction |
| FZP-OsU3T1R     | aaacCTGAGCGATCATGCATATA                  | Vectors construction |
| lax2U3T2F       | ggcaCATTCTTGCTCAGATTCCA                  | Vectors construction |
| lax2U3T2R       | aaacTGGAATCTGAGGCAAGAATG                 | Vectors construction |
| U-F             | CTCCGTTTTACCTGTGGAATCG                   | Vectors construction |
| gRNA-R          | CGGAGGAAAATTCCATCCAC                     | Vectors construction |
| Uctcg-B1'       | TTCAGAggtctcTctcgCACTGGAATCGGCAGCAAAGG   | Vectors construction |
| gRcgg-BL        | AGCGTGggtctcGaccgGGTCCATCCACTCCAAGCTC    | Vectors construction |
| Ubiquitin-realF | aaccagctgaggcccaaga                      | qRT-PCR              |
| Ubiquitin-realR | acgattgatttaaccagtccatga                 | qRT-PCR              |
| FZP-realF       | cagggctccgactcctactct                    | qRT-PCR              |
| FZP-realR       | caatgcccgggtgcaactc                      | qRT-PCR              |
| OsYUCCA1-realF  | CGCAACACGGTGCATGTC                       | qRT-PCR              |
| OsYUCCA1-realR  | CGATGCCGAACGTGGATAG                      | qRT-PCR              |
| OsYUCCA2-realF  | TTGCAATGTGGCTGCTCAA                      | qRT-PCR              |
| OsYUCCA2-realR  | AAGCAGTAAAATCCGGTCTACGA                  | qRT-PCR              |
| OsYUCCA3-realF  | TCTTGACGTCGGCACATTTG                     | qRT-PCR              |
| OsYUCCA3-realR  | ATGGCCGGCCGTACCT                         | qRT-PCR              |
| OsYUCCA4-realF  | AAGGTGACCCCAGCAATACAA                    | qRT-PCR              |
| OsYUCCA4-realR  | AGTGCTGCCATCCACAACTC                     | qRT-PCR              |
| OsYUCCA5-realF  | CGTCAGGGACAAGATTCATGTTC                  | qRT-PCR              |
| OsYUCCA5-realR  | CTGAGAGGCCAAATGTTGAGATG                  | qRT-PCR              |
| OsYUCCA6-realF  | ACCGGATACCAAAGCAACGT                     | qRT-PCR              |
| OsYUCCA6-realR  | CCCCTCTTGTGTGAAGAAGTCACT                 | qRT-PCR              |
| OsYUCCA7-realF  | AGCAATGTGCCCAATGG                        | qRT-PCR              |
| OsYUCCA7-realR  | TGGGTACCCGTCCTTGTTGA                     | qRT-PCR              |

|              |                                     |                  |
|--------------|-------------------------------------|------------------|
| OsYUC12F     | CATAGTTGTTGCGAGCCC                  | qRT-PCR          |
| OsYUC12R     | CATTACAAGAAGAGGGTCC                 | qRT-PCR          |
| OsGRF6F      | CTTGCTCTCTGCAATATAGC                | qRT-PCR          |
| OsGRF6R      | GAGAACGGAAACAGGCTG                  | qRT-PCR          |
| OsSPL10F     | CTGCCAGCAATGCAGCAG                  | qRT-PCR          |
| OsSPL10R     | CGTCGCCGCCGCCGCCGG                  | qRT-PCR          |
| HL6F         | CACATCTGCACCTCCACTTG                | qRT-PCR          |
| HL6R         | GATCCTCCGGGGCAGCTGCC                | qRT-PCR          |
| OSHB1F       | TGGTTCCAGAACAGAAG                   | qRT-PCR          |
| OSHB1R       | GAGACCTGCTTCTGGAGTC                 | qRT-PCR          |
| OSH1F        | CATGGCGCACACGCCGC                   | qRT-PCR          |
| OSH1R        | CGCCGAGGACGCCGAGC                   | qRT-PCR          |
| OsHOX1F      | CTTCTCCTCGTCTTCCTC                  | qRT-PCR          |
| OsHOX1R      | CTGCCGCCGGCGCACGGTTC                | qRT-PCR          |
| OsHOX28F     | GACGCACCACACCCTCAC                  | qRT-PCR          |
| OsHOX28R     | CACCTCCGTCTGCTTCAGC                 | qRT-PCR          |
| DNR1F        | GAAGCACTTCTCGAGAAG                  | qRT-PCR          |
| DNR1R        | GGTGAGGACCACATTTAC                  | qRT-PCR          |
| REL2F        | CAGGAGGTCAAGGTAATTC                 | qRT-PCR          |
| REL2R        | CTTGGTCTTATCCAGCTTG                 | qRT-PCR          |
| OsFTIP7F     | CAGCCAGTGGTACAATCTTG                | qRT-PCR          |
| OsFTIP7R     | GCTGTAATGTGTTGACTC                  | qRT-PCR          |
| OsZPR4F      | GAGAGGGTGAACCTGAAGC                 | qRT-PCR          |
| OsZPR4R      | GTTGGTGTGAGCTTGCGC                  | qRT-PCR          |
| OsSAUR45F    | CAGTGCCAGGAGACTTG                   | qRT-PCR          |
| OsSAUR45R    | CTGCTACAGATGTGCAGC                  | qRT-PCR          |
| OsARID3F     | GAAGGGTTGAATTGCCTC                  | qRT-PCR          |
| OsARID3R     | CTTCTCATAGAAGTTACGG                 | qRT-PCR          |
| OsWOX3BF     | CACCGCCGCCGCCGCAC                   | qRT-PCR          |
| OsWOX3BR     | GACGAACGCCCGATCGCC                  | qRT-PCR          |
| (PL)YUCCA2-F | atctgtcgacctcgagAGGAAAACCAGGAG      | Yeast one hybrid |
| (PL)YUCCA2-R | gagcacatgcctcgagCTTTGATATGCTTG      | Yeast one hybrid |
| (PL)YUCCA5-R | gagcacatgcctcgagCCATCTTGTTGCGAGGTT  | Yeast one hybrid |
| (PL)YUCCA6-F | atctgtcgacctcgagTGCTCCACTCCACTGATG  | Yeast one hybrid |
| (PL)YUCCA6-R | gagcacatgcctcgagGAGGTGACGGAAGTGGTTG | Yeast one hybrid |
| (PL)OsSPL10F | atctgtcgacctcgagGGCATGCACAAATCCC    | Yeast one hybrid |
| (PL)OsSPL10R | gagcacatgcctcgagGCCCCGCCTCCTCCTCG   | Yeast one hybrid |
| (PL)HL6F     | atctgtcgacctcgagCTAAAGTGCAACCATG    | Yeast one hybrid |
| (PL)HL6R     | gagcacatgcctcgagGCGGATAGATATGATC    | Yeast one hybrid |
| (PL)OSH1F    | atctgtcgacctcgagGAGGTACAGAGGTTC     | Yeast one hybrid |
| (PL)OSH1R    | gagcacatgcctcgagGAGAGAAGCTCAAGAC    | Yeast one hybrid |
| (PL)OsHOX1F  | atctgtcgacctcgagGTGGTCAAAAGTGAG     | Yeast one hybrid |
| (PL)OsHOX1R  | gagcacatgcctcgagTGATTCCTCTCAACTC    | Yeast one hybrid |
| (PL)OsHOX28F | atctgtcgacctcgagCACCCGGGACCAAC      | Yeast one hybrid |

|               |                                                                 |                  |
|---------------|-----------------------------------------------------------------|------------------|
| (PL)OsHOX28R  | gagcacatgcctcgagGTCTTAAGTGCTCTAG                                | Yeast one hybrid |
| (PL)OsFTIP7F  | atctgtcgacctcgagCGGTAGAGATTCCGG                                 | Yeast one hybrid |
| (PL)OsFTIP7R  | gagcacatgcctcgagGAACGAAATTCTTG                                  | Yeast one hybrid |
| chip-YUC6-F1  | CACTAATTTTATTTGGCTAC                                            | ChIP-qPCR        |
| chip-YUC6-R1  | TGATGTTTTGGTGTTGAA                                              | ChIP-qPCR        |
| chip-YUC6-F2  | CCACAATTCCACTTCTAT                                              | ChIP-qPCR        |
| chip-YUC6-R2  | TGGCACCATTGTCTCACT                                              | ChIP-qPCR        |
| chip-YUC6-R3  | AGACAATGGTGCCAATCA                                              | ChIP-qPCR        |
| chip-YUC6-F3  | CAGCCAATAATGCTAAAACA                                            | ChIP-qPCR        |
| chip-YUC6-F4  | TTAGCATTATTGGCTGTA                                              | ChIP-qPCR        |
| chip-YUC6-R4  | GTTCTGGCATTGGCTCTA                                              | ChIP-qPCR        |
| chip-YUC6-F5  | TAGTACGGTAGAGCCAATG                                             | ChIP-qPCR        |
| chip-YUC6-R5  | AACTTTTATGCACGAATC                                              | ChIP-qPCR        |
| chip-YUC6-R6  | GGAAGCACTTATACCTCT                                              | ChIP-qPCR        |
| chip-YUC6-F6  | TACTCCCTCTGTCCCAA                                               | ChIP-qPCR        |
| chip-YUC6-F7  | TGGGACAGAGGGAGTAGAAA                                            | ChIP-qPCR        |
| chip-YUC6-R7  | ACCGTTGGACATCGGCAC                                              | ChIP-qPCR        |
| chip-YUC6-F8  | GATGTCCAACGGTCCAAG                                              | ChIP-qPCR        |
| chip-YUC6-R8  | GTGTAGCTGTGCCTGTGC                                              | ChIP-qPCR        |
| chip-YUC6-F9  | GCACAGGCACAGCTACAC                                              | ChIP-qPCR        |
| chip-YUC6-R9  | GCAAGGCAAGGATGAGGA                                              | ChIP-qPCR        |
| chip-YUC6-F10 | CCTCATCCTTGCCTTGCC                                              | ChIP-qPCR        |
| chip-YUC6-R10 | GCCGGAGTGAGACTGTGA                                              | ChIP-qPCR        |
| chip-YUC6-F11 | TCGCTGTCCCTCGCTCACT                                             | ChIP-qPCR        |
| chip-YUC6-R11 | GACCACGATCGGCCCGTT                                              | ChIP-qPCR        |
| chip-YUC6-F3  | CAGCCAATAATGCTAAAACA                                            | ChIP-qPCR        |
| chip-YUC6-F4  | TTAGCATTATTGGCTGTA                                              | ChIP-qPCR        |
| chip-YUC6-R4  | GTTCTGGCATTGGCTCTA                                              | ChIP-qPCR        |
| chip-YUC6-F5  | TAGTACGGTAGAGCCAATG                                             | ChIP-qPCR        |
| chip-YUC6-R5  | AACTTTTATGCACGAATC                                              | ChIP-qPCR        |
| chip-YUC6-R6  | GGAAGCACTTATACCTCT                                              | ChIP-qPCR        |
| chip-YUC6-F6  | TACTCCCTCTGTCCCAA                                               | ChIP-qPCR        |
| chip-YUC6-F7  | TGGGACAGAGGGAGTAGAAA                                            | ChIP-qPCR        |
| chip-YUC6-R7  | ACCGTTGGACATCGGCAC                                              | ChIP-qPCR        |
| chip-YUC6-F8  | GATGTCCAACGGTCCAAG                                              | ChIP-qPCR        |
| chip-YUC6-R8  | GTGTAGCTGTGCCTGTGC                                              | ChIP-qPCR        |
| chip-YUC6-F9  | GCACAGGCACAGCTACAC                                              | ChIP-qPCR        |
| chip-YUC6-R9  | GCAAGGCAAGGATGAGGA                                              | ChIP-qPCR        |
| chip-YUC6-F10 | CCTCATCCTTGCCTTGCC                                              | ChIP-qPCR        |
| chip-YUC6-R10 | GCCGGAGTGAGACTGTGA                                              | ChIP-qPCR        |
| chip-YUC6-F11 | TCGCTGTCCCTCGCTCACT                                             | ChIP-qPCR        |
| chip-YUC6-R11 | GACCACGATCGGCCCGTT                                              | ChIP-qPCR        |
| YUCCA6-ES-F   | GTAGGGTCGAAAGACGGTGCCGATGTCCAACGGTCCA<br>AGACATAGAGTGAAAAAGAAAG | EMSA<br>EMSA     |

|                |                                                                   |                  |
|----------------|-------------------------------------------------------------------|------------------|
| YUCCA6-ES-R    | CTTTCTTTTTCACCTCTATGTCTTGGACCGTTGGACATCG<br>GCACCGTCTTTTCGACCCTAC | EMSA<br>EMSA     |
| (BK)LAX2/199-F | atggaggccgaattcATGCCGCCGCCGGGATCC                                 | Yeast two hybrid |
| (BK)LAX2/338-R | gatccccgggaattcCTACTCTGATTCATCTTC                                 | Yeast two hybrid |
| (AD)LAX2/199-F | gaggccagtgaattcATGAACACTCGAGGCAG                                  | Yeast two hybrid |
| (AD)LAX2/338-R | acccgggtggaattcTCAATGGGAGAGGAAGC                                  | Yeast two hybrid |
| (YC)LAX2-F     | GGAGCTCGGTACCCGGGATGGTCCCGGCTCGG                                  | BiFC             |
| (YC)LAX2-R     | GTATGGGTACATACTAGTGGGCCTTCTGCCATAC                                | BiFC             |
| (YN)FZP-F      | GAGGAGGATCTTCCCGGGAACACTCGAGGCAGCGGC                              | BiFC             |
| (YN)FZP-R      | ATGCCTGCAGGTGCACTCAATGGGAGAGGAAGC                                 | BiFC             |
| MBP-PAA7-F     | ttcggatcctctagagtcgacATGAACACTCGAGGCAGC                           | Pull-down        |
| MBP-PAA7-R     | caagcttgctgcaggtcgacATGGGAGAGGAAGCTGAA                            | Pull-down        |
| GST-LAX2-F     | CTGGTTCCGCGTGGATCCATGCCGCCGCCGGGATCC                              | Pull-down        |
| GST-LAX2-R     | CGGGAATTCCGGGGATCCTGGACGGCGACCATACTG                              | Pull-down        |
| GFP-PAA7-F     | GGGCTGCAGGAATTCATGAACACTCGAGGCAGC                                 | CO-IP            |
| GFP-PAA7-R     | CTTGATATCGAATTCATGGGAGAGGAAGCTGAA                                 | CO-IP            |
| HA-LAX2-F      | GCTCGGTACCAAGCTTATGCCGCCGCCGGGATCC                                | CO-IP            |
| HA-LAX2-R      | CCGCACTAGTAAGCTTGGGCCTTCTGCCATAC                                  | CO-IP            |

---
